# Supplementary material
Source: Springer Nature journal article supplement (https://www.springermedizin.de/resource/supplementary/40248_2014_168_MOESM1_ESM.pdf/9686250)
Supplement: MOESM1 [file 9686250]

32 patients with COPD screened

3 patients did not fulfill the criteria

29 eligible patients

2 patients did not consent to take part

Data of 27 patients with COPD were analysed

23 patients were included in the analysis of physical activity
